# Supplementary material for: CBe4H6: a molecular rotor with a built-in on–off switch
Source: Royal Society of Chemistry journal article supplement (doi:10.1039/d3nr05695c), 2024-01-01
Supplement: d3nr05695c1.pdf [file d3nr05695c1.pdf]

Electronic Supplementary Information 1

## **CBe<sub>4</sub>H<sub>6</sub>: A molecular rotor with a built-in on-off switch**

Bo Jin,<sup>abc</sup> Caixia Yuan,<sup>ab</sup> Jin-Chang Guo,<sup>ab</sup> and Yan-Bo Wu<sup>\*ab</sup>

<sup>a</sup> Key Laboratory of Materials for Energy Conversion and Storage of Shanxi Province, Institute of Molecular Science, Shanxi University, 92 Wucheng Road, Taiyuan, Shanxi, 030006, People's Republic of China.

<sup>b</sup> Key Laboratory of Chemical Biology and Molecular Engineering of Ministry of Education, Institute of Molecular Science, Shanxi University, 92 Wucheng Road, Taiyuan, Shanxi, 030006, People's Republic of China.

<sup>c</sup> Department of Chemistry, Xinzhou Normal University, 1 East Dunqi Street, Xinzhou, Shanxi, 034000, People's Republic of China

\*To whom correspondence should be addressed.

E-mail: [wbyb@sxu.edu.cn](mailto:wbyb@sxu.edu.cn) (Y.B.W.)

### Contents

**Fig. S1** Plots of root-mean-square deviation (RMSD, in Å and relative to the PBE/DZVP-optimized structures) for 50 pico-second (ps) BOMD simulations of CBe<sub>4</sub>H<sub>5</sub><sup>-</sup> system (starting from **1A**) at the PBE/DZVP level.

**Fig. S2** Structures and relative energies ( $\Delta E$ , in kcal/mol at the CCSD(T)//B2PLYP level) of CBe<sub>4</sub>H<sub>5</sub><sup>-</sup> and CBe<sub>4</sub>H<sub>6</sub> and their lowest-lying isomers.

Cartesian coordinates of B2PLYP-D3(BJ)/aug-cc-pVTZ-optimized structures shown in Fig. 1 and Fig. S2.

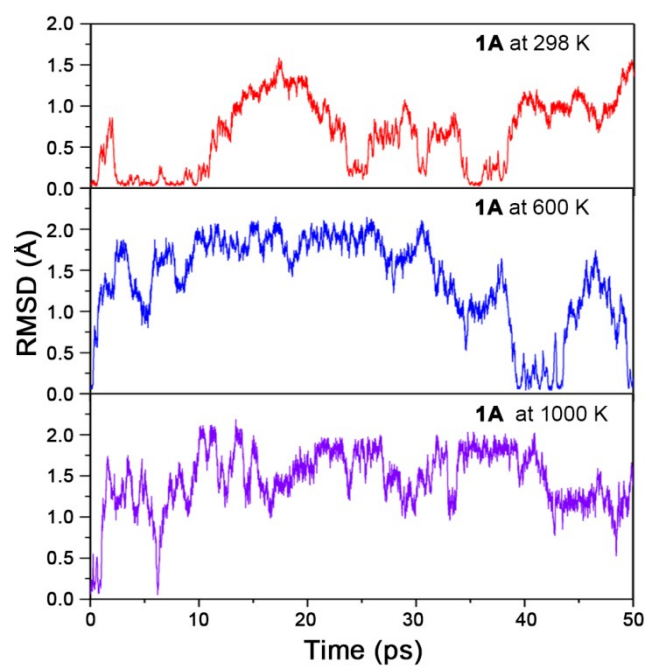

**Fig. S1** Plots of root-mean-square deviation (RMSD, in Å and relative to the PBE/DZVP-optimized structures) for 50 pico-second (ps) BOMD simulations of  $\text{CBe}_4\text{H}_5^-$  system (starting from **1A**) at the PBE/DZVP level.

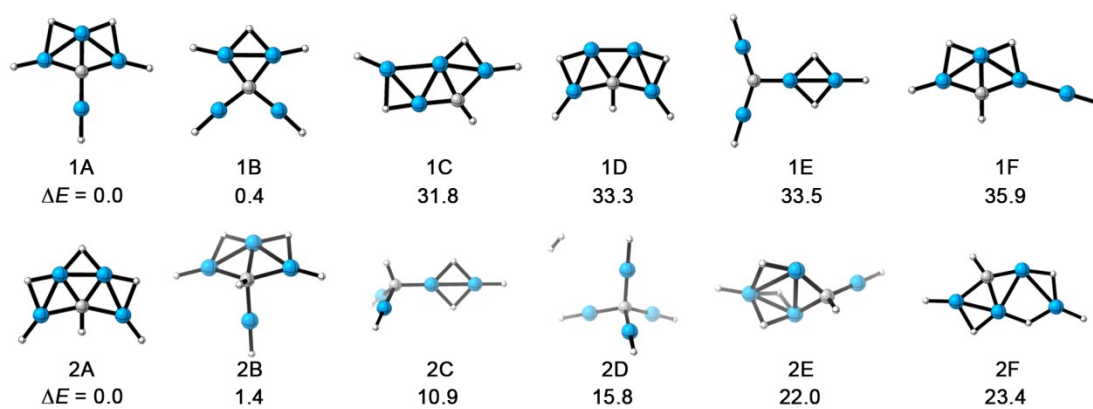

**Fig. S2** Structures and relative energies ( $\Delta E$ , in kcal/mol at the CCSD(T)//B2PLYP level) of  $\text{CBe}_4\text{H}_5^-$  and  $\text{CBe}_4\text{H}_6$  and their lowest-lying isomers.

Cartesian coordinates of B2PLYP-D3(BJ)/aug-cc-pVTZ-optimized structures shown in Fig. 1 and Fig. S2.

**0**

|    |            |             |             |
|----|------------|-------------|-------------|
| C  | 0.00000000 | 0.00000000  | 0.00000000  |
| Be | 0.00000000 | 1.14790900  | 1.14567300  |
| Be | 0.00000000 | -1.14790900 | 1.14567300  |
| Be | 0.00000000 | -1.14790900 | -1.14567300 |
| Be | 0.00000000 | 1.14790900  | -1.14567300 |
| H  | 0.00000000 | 2.06373700  | 2.13244100  |
| H  | 0.00000000 | 2.06373700  | -2.13244100 |
| H  | 0.00000000 | -2.06373700 | -2.13244100 |
| H  | 0.00000000 | -2.06373700 | 2.13244100  |

**1A**

|    |            |             |             |
|----|------------|-------------|-------------|
| C  | 0.00000000 | 0.00000000  | 0.21574100  |
| Be | 0.00000000 | 0.00000000  | 1.80653800  |
| Be | 0.00000000 | 1.60227200  | -0.27294000 |
| Be | 0.00000000 | 0.00000000  | -1.42665600 |
| Be | 0.00000000 | -1.60227200 | -0.27294000 |
| H  | 0.00000000 | 2.93273100  | 0.03392400  |
| H  | 0.00000000 | 1.31612800  | -1.92778200 |
| H  | 0.00000000 | -1.31612800 | -1.92778200 |
| H  | 0.00000000 | -2.93273100 | 0.03392400  |
| H  | 0.00000000 | 0.00000000  | 3.15726600  |

**1B**

|    |            |             |             |
|----|------------|-------------|-------------|
| C  | 0.00000000 | 0.00000000  | 0.18470600  |
| Be | 0.00000000 | 1.26503900  | 1.15609300  |
| Be | 0.00000000 | 1.00182800  | -1.16768800 |
| Be | 0.00000000 | -1.00182800 | -1.16768800 |
| Be | 0.00000000 | -1.26503900 | 1.15609300  |
| H  | 0.00000000 | 2.34212800  | -1.44600300 |
| H  | 0.00000000 | 0.00000000  | -2.26669400 |
| H  | 0.00000000 | -2.34212800 | -1.44600300 |
| H  | 0.00000000 | -2.25574300 | 2.07160800  |
| H  | 0.00000000 | 2.25574300  | 2.07160800  |

**TS1**

|    |             |             |            |
|----|-------------|-------------|------------|
| C  | 0.00000000  | 0.19980600  | 0.00000000 |
| Be | 1.59974800  | 0.45910700  | 0.00000000 |
| Be | 0.51783700  | -1.38262700 | 0.00000000 |
| Be | -1.37218800 | -0.77462800 | 0.00000000 |
| Be | -0.72782100 | 1.61366400  | 0.00000000 |

|   |             |             |            |
|---|-------------|-------------|------------|
| H | 1.83392800  | -1.78469100 | 0.00000000 |
| H | -0.69532900 | -2.16914500 | 0.00000000 |
| H | -2.73941500 | -0.75411900 | 0.00000000 |
| H | -1.30424700 | 2.83380100  | 0.00000000 |
| H | 2.83475600  | 1.01324900  | 0.00000000 |

### 1C

|    |             |             |             |
|----|-------------|-------------|-------------|
| C  | -0.76463300 | 0.73729000  | 0.00004200  |
| Be | 2.22275300  | -0.52887300 | 0.00013800  |
| Be | -0.00154200 | -0.76770800 | -0.00020000 |
| Be | -1.93121800 | -0.53435000 | -0.00000900 |
| Be | 0.85944900  | 0.92192000  | 0.00005800  |
| H  | 2.25565100  | 1.14235100  | -0.00016700 |
| H  | -1.02893300 | -1.76827300 | -0.00020800 |
| H  | -3.28762900 | -0.70850100 | -0.00001700 |
| H  | 3.48133400  | -1.05066000 | 0.00012300  |
| H  | -1.43039600 | 1.59739100  | 0.00006700  |

### 1D

|    |             |             |             |
|----|-------------|-------------|-------------|
| C  | 0.00000000  | -0.25250500 | -0.00020900 |
| Be | -0.94341200 | 1.19346400  | 0.00003300  |
| Be | 0.94340800  | 1.19346200  | -0.00004800 |
| Be | 1.70296700  | -0.60491100 | 0.00015400  |
| Be | -1.70296500 | -0.60491400 | 0.00012100  |
| H  | 2.31063900  | 0.78557200  | 0.00021500  |
| H  | -2.50618000 | -1.70141900 | 0.00014600  |
| H  | 2.50618100  | -1.70141600 | 0.00022900  |
| H  | 0.00000300  | -1.36167900 | -0.00063000 |
| H  | -2.31064100 | 0.78556700  | 0.00025300  |

### 1E

|    |             |             |             |
|----|-------------|-------------|-------------|
| C  | -0.98143300 | -0.00077900 | -0.00026900 |
| Be | -1.39095700 | 1.53034700  | 0.00013700  |
| Be | 2.62766800  | 0.00297400  | 0.00006500  |
| Be | -1.38321900 | -1.53400500 | 0.00011400  |
| Be | 0.62445600  | 0.00112100  | -0.00014300 |
| H  | 1.70993300  | 1.08519600  | -0.00030200 |
| H  | -1.71799400 | 2.84728900  | 0.00046000  |
| H  | -1.70335800 | -2.85263400 | 0.00032400  |
| H  | 1.71189700  | -1.08092700 | 0.00018300  |
| H  | 3.97632700  | 0.00399200  | 0.00025700  |

### 1F

|   |            |             |            |
|---|------------|-------------|------------|
| C | 0.52848400 | -0.58282700 | 0.00017800 |
|---|------------|-------------|------------|

|    |             |             |             |
|----|-------------|-------------|-------------|
| Be | 2.20962200  | -0.25783400 | -0.00000600 |
| Be | 0.76237900  | 1.00801700  | 0.00018500  |
| Be | -3.05249500 | -0.13141700 | -0.00010900 |
| Be | -0.98988400 | 0.20519700  | -0.00026500 |
| H  | -4.39911900 | -0.37376000 | 0.00028700  |
| H  | 3.46149400  | -0.81001900 | -0.00074200 |
| H  | 2.14386800  | 1.33357500  | 0.00010500  |
| H  | -0.47510700 | 1.70604100  | -0.00014600 |
| H  | 0.37947400  | -1.65472400 | 0.00021600  |

## 2A

|    |            |             |             |
|----|------------|-------------|-------------|
| C  | 0.00000000 | 0.00000000  | 0.30648000  |
| H  | 0.00000000 | 2.54191500  | 1.74756300  |
| H  | 0.00000000 | -2.54191500 | 1.74756300  |
| Be | 0.00000000 | 1.74585300  | 0.68164600  |
| Be | 0.00000000 | 0.94265700  | -1.05815000 |
| Be | 0.00000000 | -0.94265700 | -1.05815000 |
| Be | 0.00000000 | -1.74585300 | 0.68164600  |
| H  | 0.00000000 | 2.29903100  | -0.78434000 |
| H  | 0.00000000 | 0.00000000  | -2.15484600 |
| H  | 0.00000000 | -2.29903100 | -0.78434000 |
| H  | 0.00000000 | 0.00000000  | 1.40155200  |

## 2B

|    |             |             |             |
|----|-------------|-------------|-------------|
| C  | 0.21774000  | 0.35460200  | 0.00000000  |
| H  | 0.15639900  | 0.12995500  | 2.93118900  |
| H  | -2.20185500 | 2.08667700  | 0.00000000  |
| Be | 0.21774000  | -0.24744300 | 1.65450000  |
| Be | 0.44717200  | -1.32562000 | 0.00000000  |
| Be | 0.21774000  | -0.24744300 | -1.65450000 |
| Be | -1.14143900 | 1.29664900  | 0.00000000  |
| H  | 0.35508700  | -1.79634900 | 1.31362800  |
| H  | 0.35508700  | -1.79634900 | -1.31362800 |
| H  | 0.15639900  | 0.12995500  | -2.93118900 |
| H  | 0.90759300  | 1.21392500  | 0.00000000  |

## TS2

|    |             |             |             |
|----|-------------|-------------|-------------|
| C  | 0.01634500  | -0.22655600 | 0.33980400  |
| H  | 2.43438600  | 1.08551600  | -0.14440100 |
| H  | 2.16888400  | -2.07260000 | -0.58128900 |
| Be | 1.11425100  | 1.08206500  | 0.09000500  |
| Be | -0.83559600 | 1.15763400  | -0.08344000 |
| Be | -1.63446400 | -0.64136300 | -0.13973200 |
| Be | 1.31037000  | -1.12235200 | -0.24708700 |

|   |             |             |             |
|---|-------------|-------------|-------------|
| H | 0.13686600  | 2.14037500  | -0.40669200 |
| H | -2.14618800 | 0.84988000  | -0.43654000 |
| H | -2.50020100 | -1.65309700 | -0.16457100 |
| H | -0.01006000 | -0.89467300 | 1.21568600  |

**2<sup>nd</sup>SP**

|    |             |             |             |
|----|-------------|-------------|-------------|
| C  | -0.33488000 | -0.18635000 | 0.00000000  |
| H  | 0.37947900  | 1.15272400  | 2.31384500  |
| H  | 0.34518300  | -1.98492900 | 2.27323000  |
| Be | 0.09866500  | 1.18095400  | 0.99944900  |
| Be | 0.09866500  | 1.18095400  | -0.99944900 |
| Be | 0.09866500  | -1.06311900 | -1.35526100 |
| Be | 0.09866500  | -1.06311900 | 1.35526100  |
| H  | 0.40888900  | 2.21239900  | 0.00000000  |
| H  | 0.37947900  | 1.15272400  | -2.31384500 |
| H  | 0.34518300  | -1.98492900 | -2.27323000 |
| H  | -1.42757900 | -0.37257800 | 0.00000000  |

**2C**

|    |             |             |             |
|----|-------------|-------------|-------------|
| C  | -0.82374400 | -0.00006500 | 0.43756100  |
| Be | -1.49411300 | -1.32767900 | -0.25224700 |
| Be | -1.49394000 | 1.32789200  | -0.25173900 |
| Be | 2.76612300  | -0.00013000 | -0.17461900 |
| Be | 0.80611000  | -0.00004900 | 0.16949300  |
| H  | 1.60911900  | 0.00109500  | -1.06458700 |
| H  | 4.07070000  | -0.00003100 | -0.40737600 |
| H  | -2.01050500 | -2.39899000 | -0.84331300 |
| H  | -2.00937600 | 2.39963100  | -0.84286500 |
| H  | 1.98109600  | -0.00096800 | 1.05372100  |
| H  | -1.03529000 | -0.00048300 | 1.51550400  |

**2D**

|    |             |             |             |
|----|-------------|-------------|-------------|
| C  | -0.27971700 | -0.00031600 | 0.00009600  |
| Be | 0.66371500  | -1.32882900 | -0.01267600 |
| Be | 0.65962000  | 1.33100400  | 0.02279400  |
| Be | -1.21438100 | 0.01685100  | -1.33388100 |
| Be | -1.22911900 | -0.01920400 | 1.32358700  |
| H  | 1.41272900  | 2.42175000  | 0.04125700  |
| H  | -1.97462700 | 0.03094000  | -2.41957400 |
| H  | 1.42026000  | -2.41729300 | -0.02325100 |
| H  | 3.65052900  | -0.36974600 | -0.00565400 |
| H  | -2.00137600 | -0.03455200 | 2.40075300  |
| H  | 3.65145200  | 0.37150900  | 0.00660700  |

**2E**

|    |             |             |             |
|----|-------------|-------------|-------------|
| C  | 0.94459700  | 0.28526300  | 0.43037500  |
| Be | -0.41737600 | -0.71629200 | 0.60135900  |
| Be | 2.16242100  | -0.37957400 | -0.44098900 |
| Be | -0.19626800 | 1.10321700  | -0.39665600 |
| Be | -2.15631200 | -0.24670200 | -0.23306000 |
| H  | 3.11862800  | -0.94313600 | -1.17292600 |
| H  | -1.67338400 | -0.31843300 | 1.19532200  |
| H  | -1.51413400 | 1.18554800  | -0.77506700 |
| H  | -3.42669300 | -0.34086400 | -0.63043800 |
| H  | -1.03706300 | -1.14960100 | -0.64461400 |
| H  | 1.29520100  | 0.81230600  | 1.32285700  |

**2F**

|    |             |             |             |
|----|-------------|-------------|-------------|
| C  | -0.76017100 | 0.70058600  | 0.00305900  |
| Be | 2.37086400  | -0.42285900 | 0.00786100  |
| Be | -2.05743700 | -0.48513600 | 0.00485500  |
| Be | -0.16127500 | -0.81112000 | -0.01101000 |
| Be | 0.75888400  | 1.12608300  | -0.01344200 |
| H  | 1.20088300  | -1.22264200 | -0.03592700 |
| H  | -3.39280800 | -0.53497400 | 0.01607900  |
| H  | -1.18620300 | -1.76731100 | -0.00922800 |
| H  | -1.45851000 | 1.53145800  | 0.02590200  |
| H  | 2.13647200  | 1.02953200  | -0.01531700 |
| H  | 3.61705100  | -0.86745300 | 0.04708500  |
