# Supplementary material for: CBe4H6: a molecular rotor with a built-in on–off switch
Source: Royal Society of Chemistry journal article supplement (doi:10.1039/d3nr05695c), 2024-01-01
Supplement: d3nr05695c2.pdf [file d3nr05695c2.pdf]

## **CBe<sub>4</sub>H<sub>6</sub>: A molecular rotor with a built-in on-off Switch**

Bo Jin,<sup>abc</sup> Caixia Yuan,<sup>ab</sup> Jin-Chang Guo,<sup>ab</sup> and Yan-Bo Wu<sup>\*ab</sup>

<sup>a</sup> *Key Laboratory of Materials for Energy Conversion and Storage of Shanxi Province, Institute of Molecular Science, Shanxi University, 92 Wucheng Road, Taiyuan, Shanxi, 030006, People's Republic of China.*

<sup>b</sup> *Key Laboratory of Chemical Biology and Molecular Engineering of Ministry of Education, Institute of Molecular Science, Shanxi University, 92 Wucheng Road, Taiyuan, Shanxi, 030006, People's Republic of China.*

<sup>c</sup> *Department of Chemistry, Xinzhou Normal University, 1 East Dunqi Street, Xinzhou, Shanxi, 034000, People's Republic of China.*

\*To whom correspondence should be addressed.

mail: [wyb@sxu.edu.cn](mailto:wyb@sxu.edu.cn) (Y.B.W.)

**SI-2** Videos for concerned vibrational modes, idealized rotational models, and trajectories of molecular dynamics simulations

Note: Please press [F5] to show the videos in the following slides.

Vibrational modes for lowest imaginary frequencies of transition states **TS1** and **TS2** as well as the second-order saddle point **2<sup>nd</sup>SP**

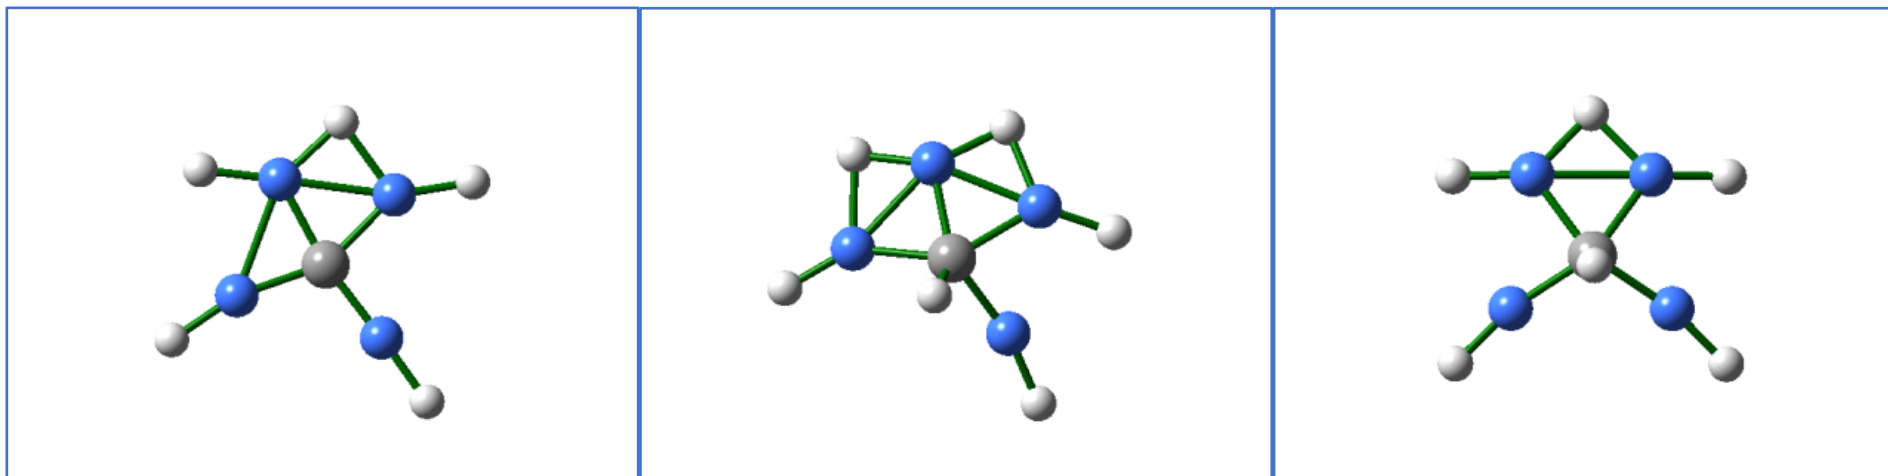

**TS1**

**TS2**

**2<sup>nd</sup>SP**

Idealized rotational model (the one-way rotations) of **1A**, **2A** and **working rotor model of 2A**

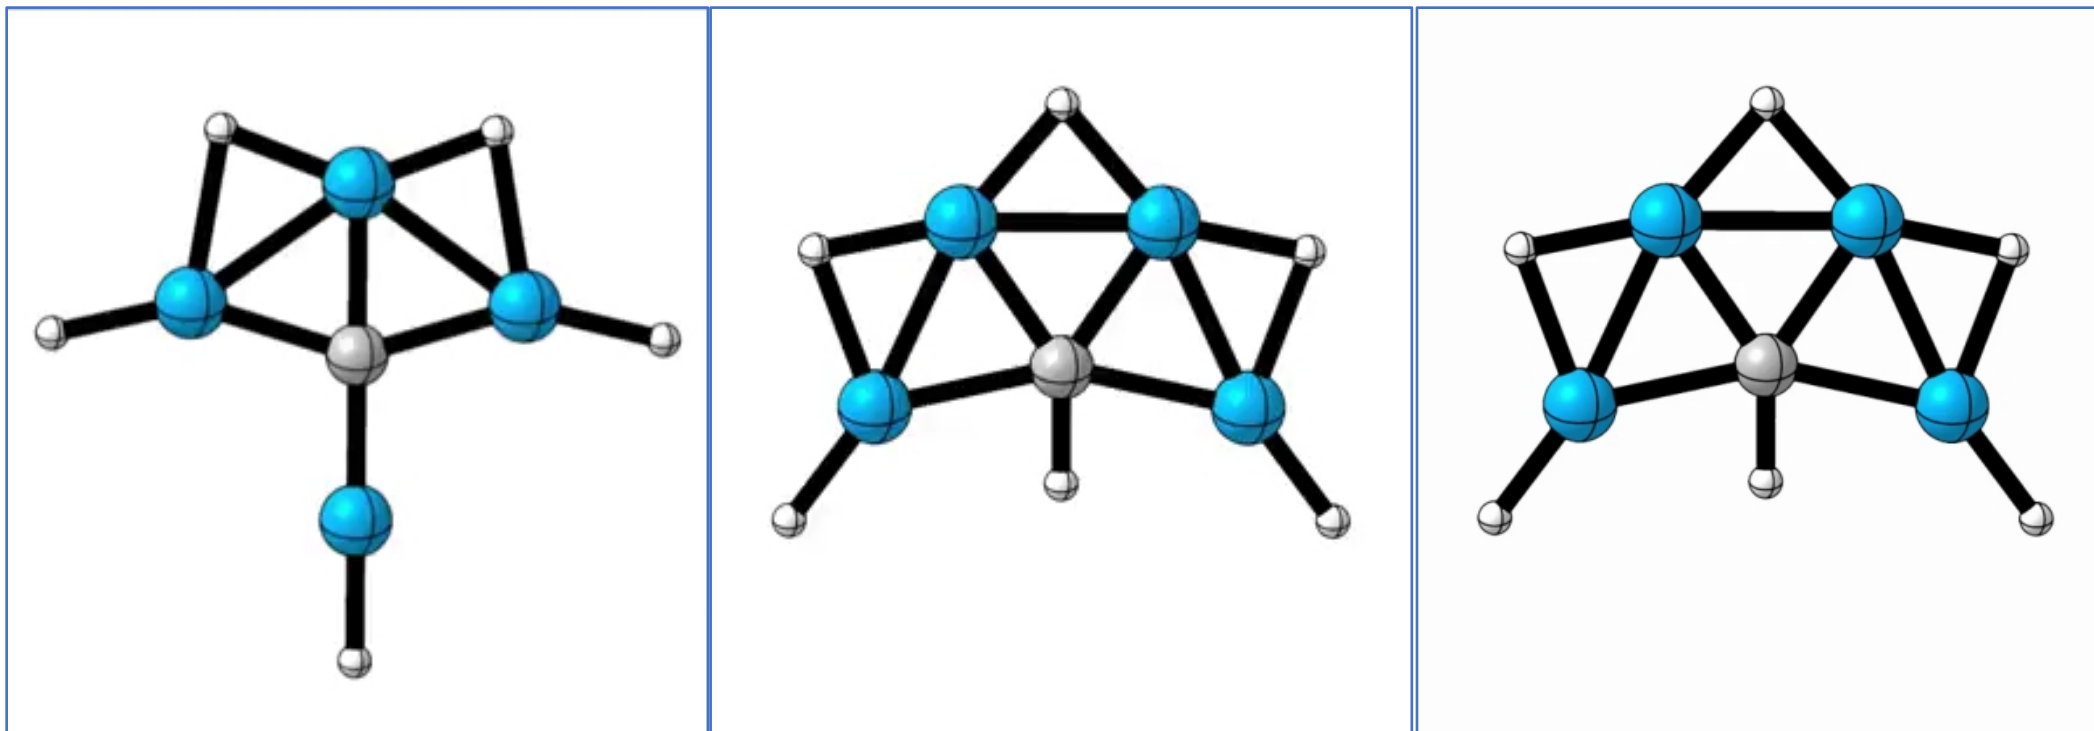

**1A**

**2A**

**Working rotor model of 2A**

Note: click the picture to view corresponding video if it does not automatically start

# Selected structural evolution in BOMD trajectories of **1A**

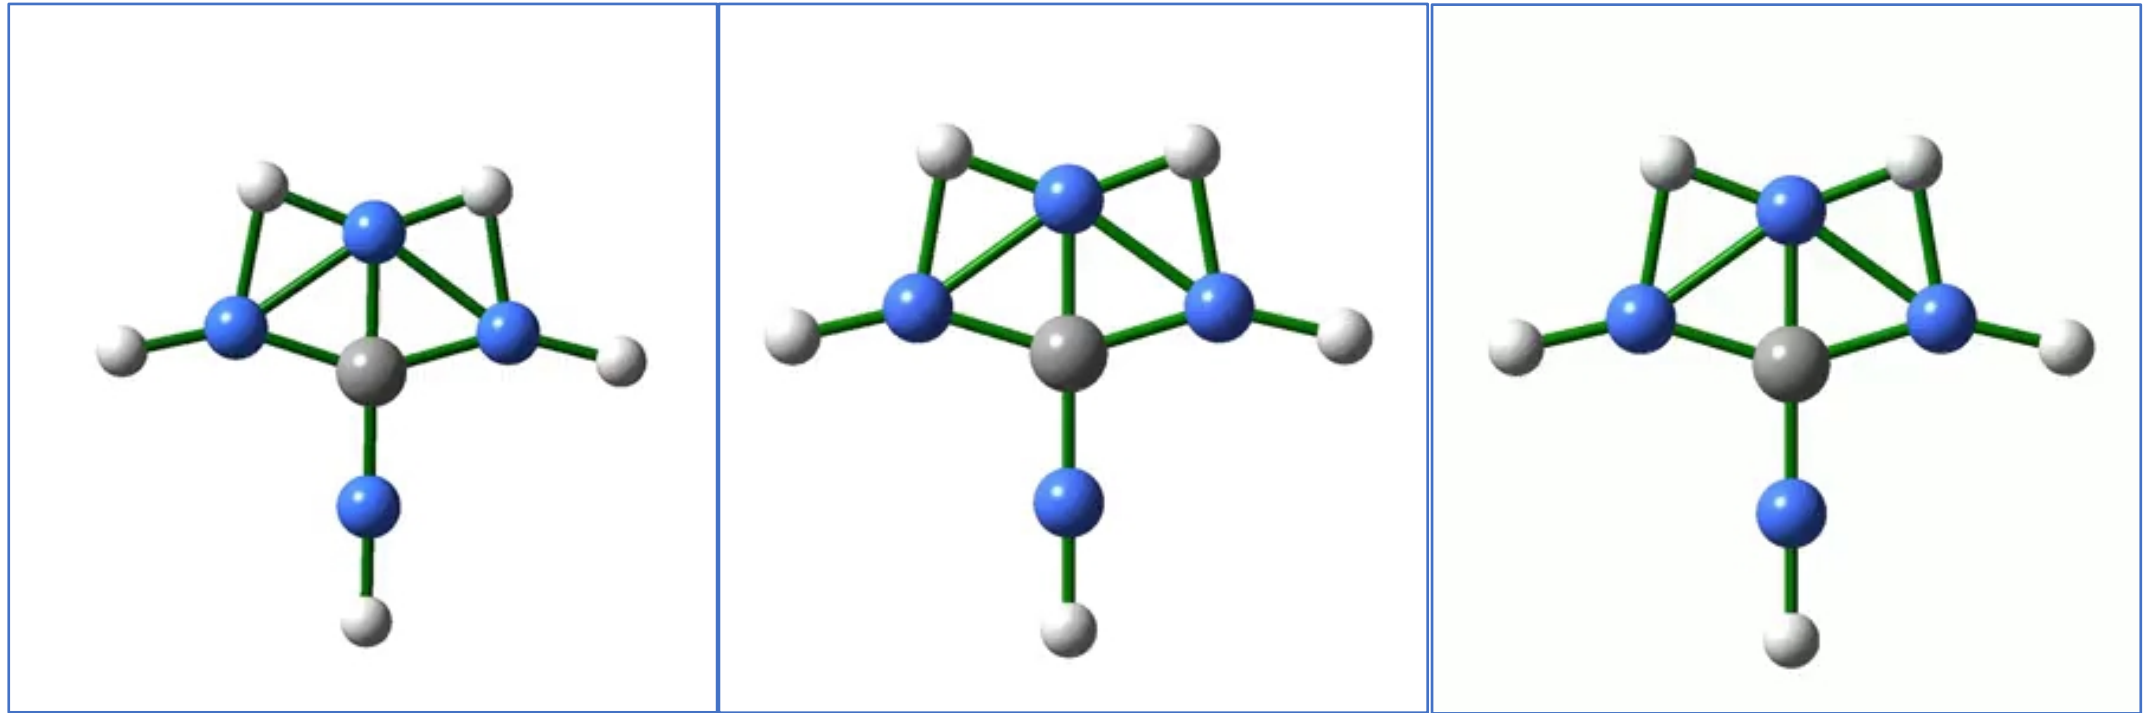

298 K

600 K

1000 K

Note: click the picture to view corresponding video if it does not automatically start

# Selected structural evolution in BOMD trajectories of **2A**

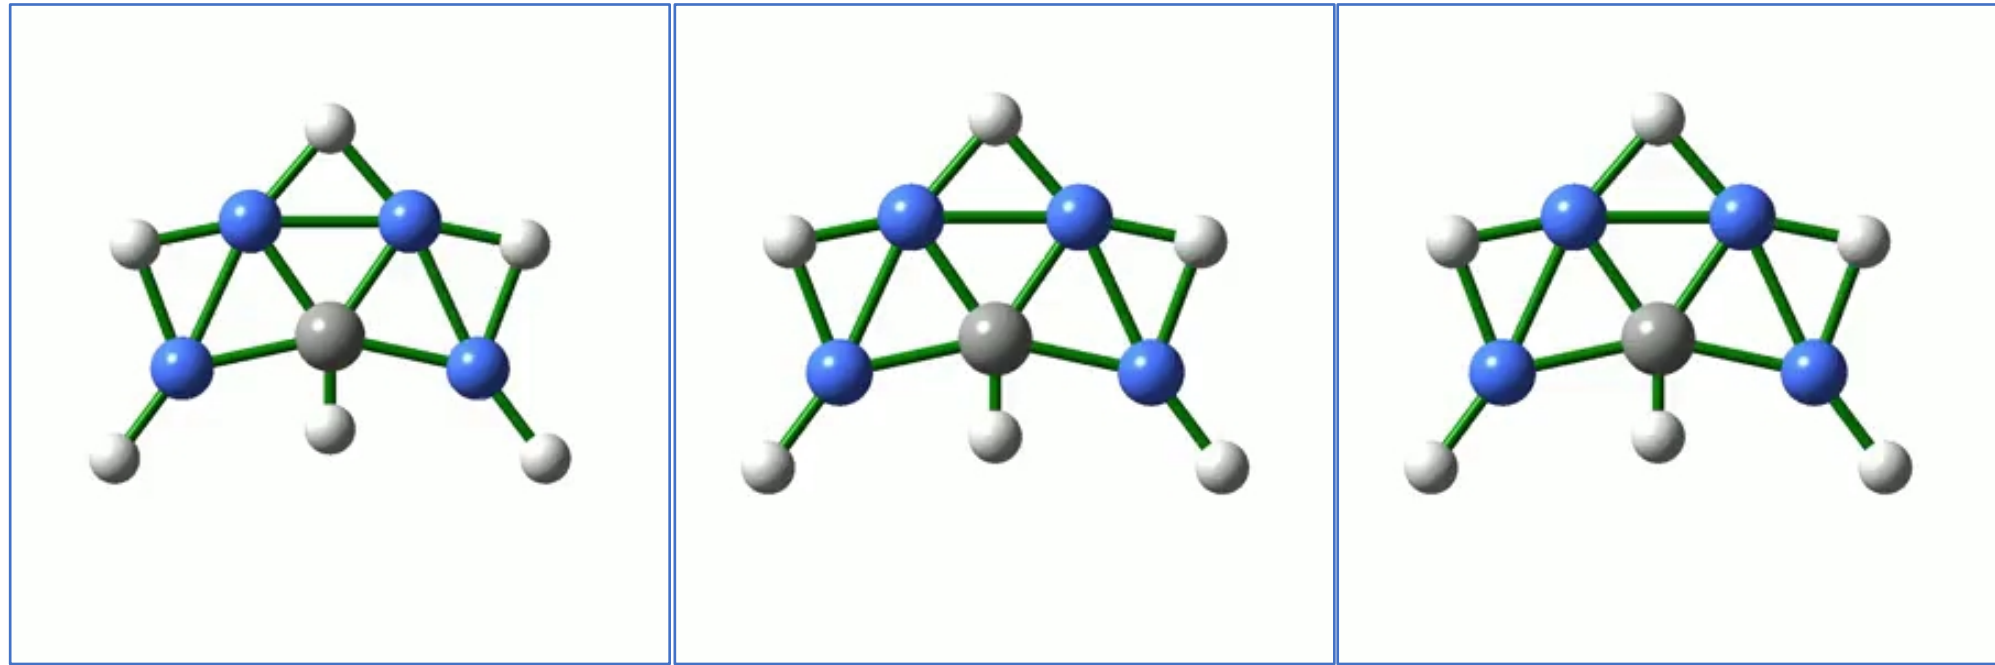

298 K

600 K

1000 K

Note: click the picture to view corresponding video if it does not automatically start
